# Supplementary material for: Comprehensive study of the adsorption of an acylhydrazone derivative by serum albumin: unclassical static quenching
Source: Royal Society of Chemistry journal article supplement (doi:10.1039/c4ra09107h), 2014-01-01
Supplement: c4ra09107h1.pdf [file c4ra09107h1.pdf]

## **Comprehensive study of the adsorption of an acylhydrazone derivative by serum albumin: An unclassical static quenching**

### **Content:**

**Figure 1.** The  $^1\text{H}$  NMR for NCH.

**Figure 2.** The ESI-MS spectra of NCH.

**Figure 3.** The IR spectrum of NCH.

**Figure 4.** The addition UV-visible spectra of HSA-NCH[A] and BSA-NCH[B] system.

**Figure 5.** The Langmuir isotherm plots for HSA-NCH[A] and BSA-NCH[B] system.

**Figure 6.** 3D fluorescence spectra of HSA[A], NCH-HSA[B], BSA[C] and BSA-NCH[D].

**Figure 7.** The detailed docking results of NCH and BSA.

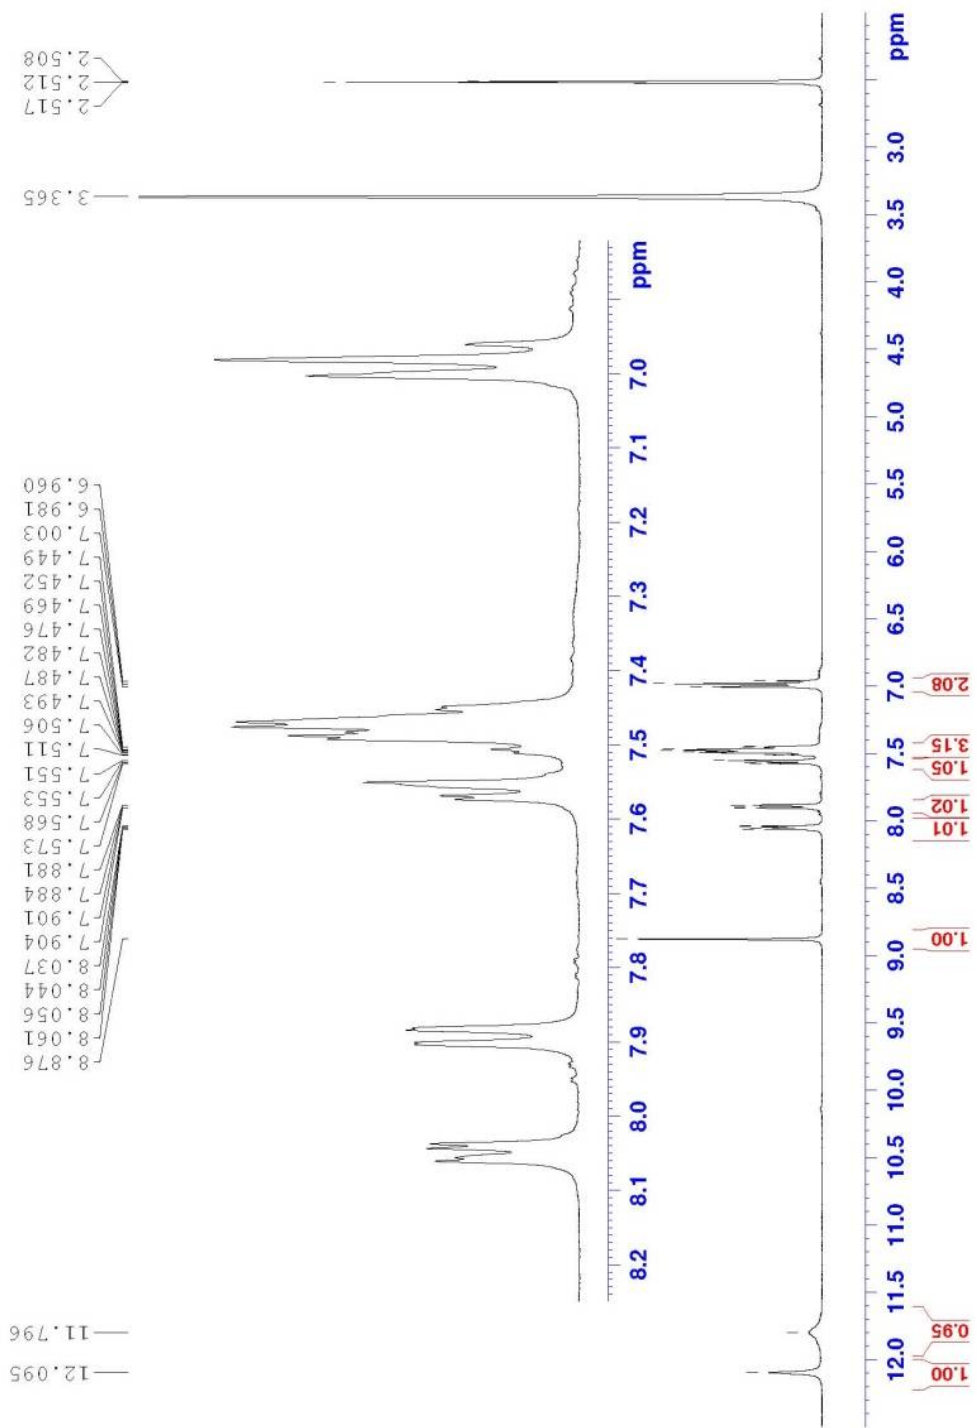

**Figure 1.** The  $^1\text{H}$  NMR for NCH.

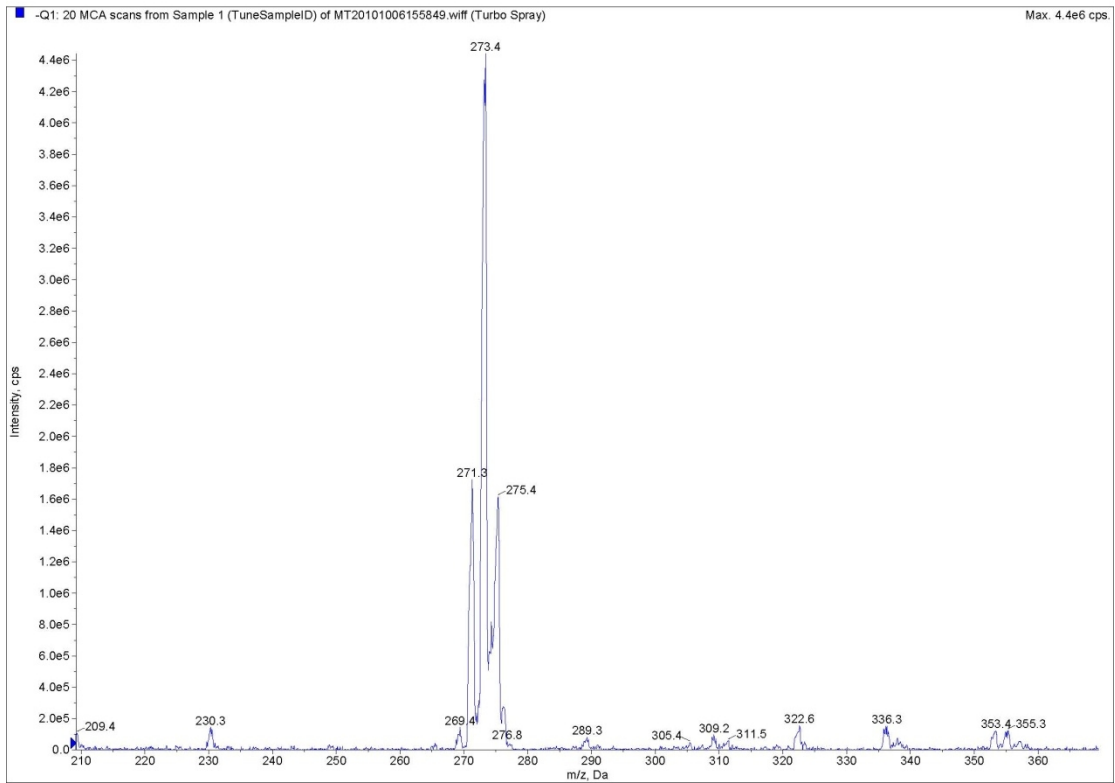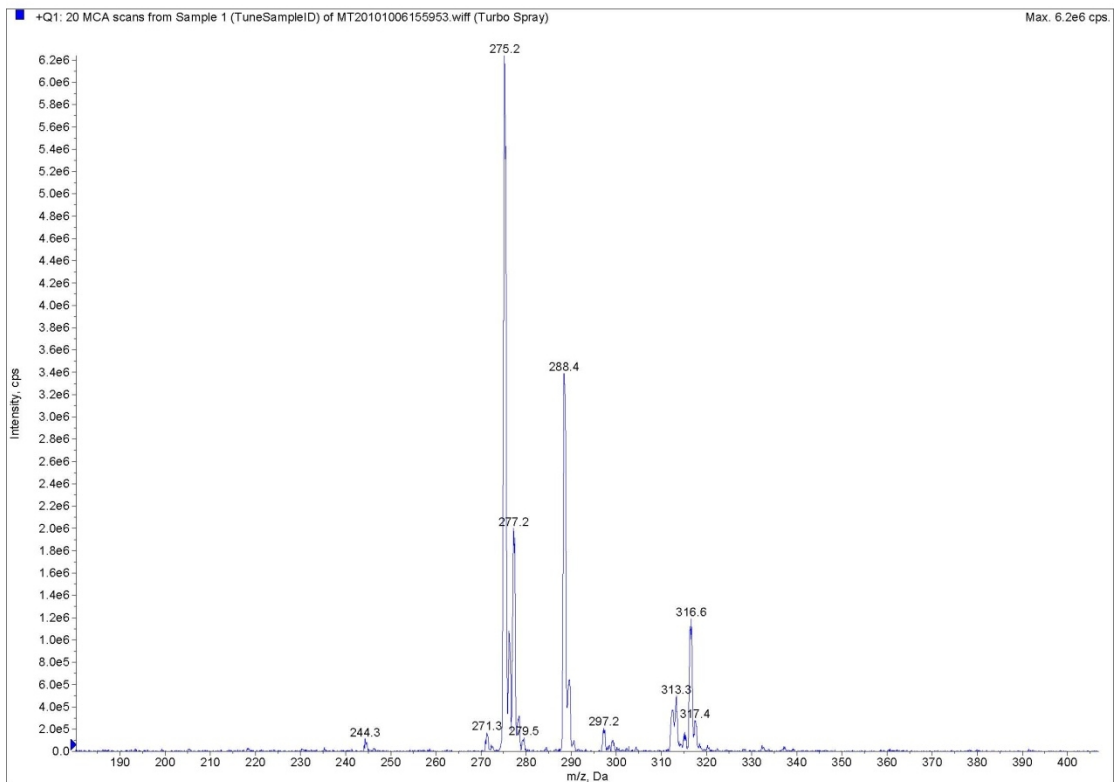

**Figure 2.** The ESI-MS spectra of NCH.  
Up: the negative mode; Down: the positive mode.

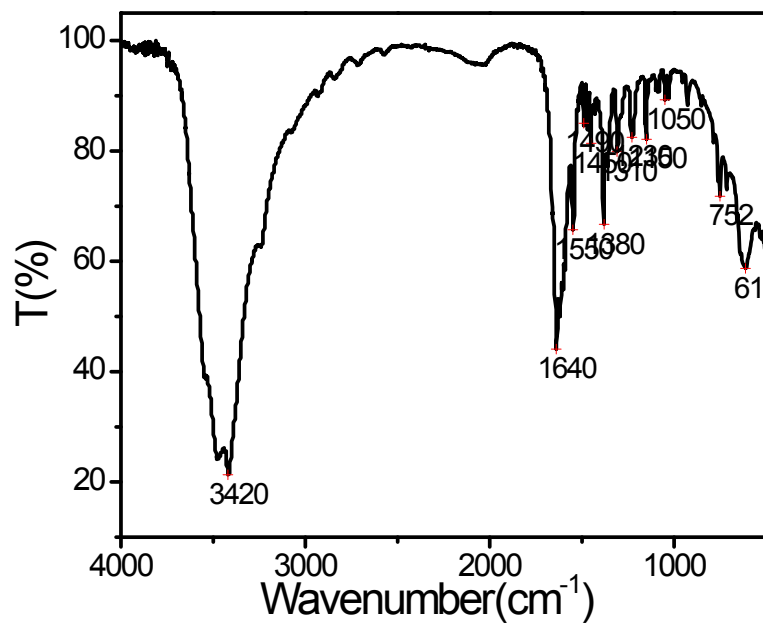

**Figure 3.** The IR spectrum of NCH.

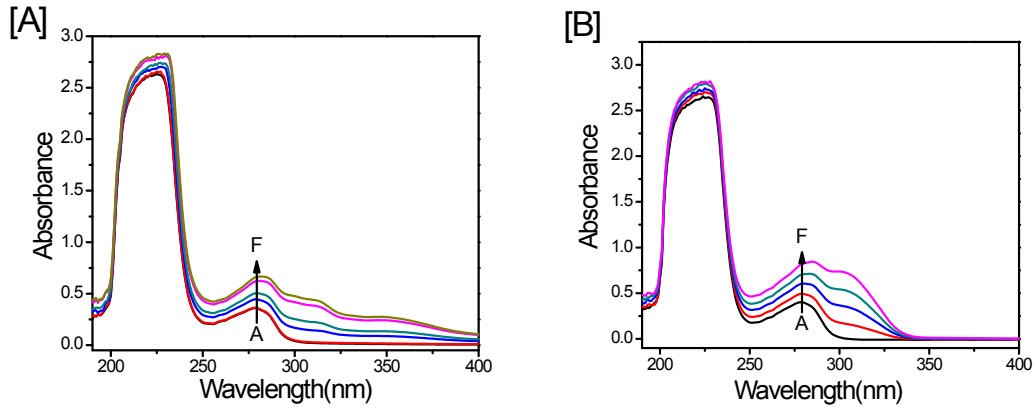

**Figure 4.** The addition UV-visible spectra of HSA-NCH[A] and BSA-NCH[B] system.

$c(\text{HSA}) = c(\text{BSA}) = 10\mu\text{M}$ , the concentration of NCH from A to F: 0, 2.5, 5, 10, 15, 20 $\mu\text{M}$ .

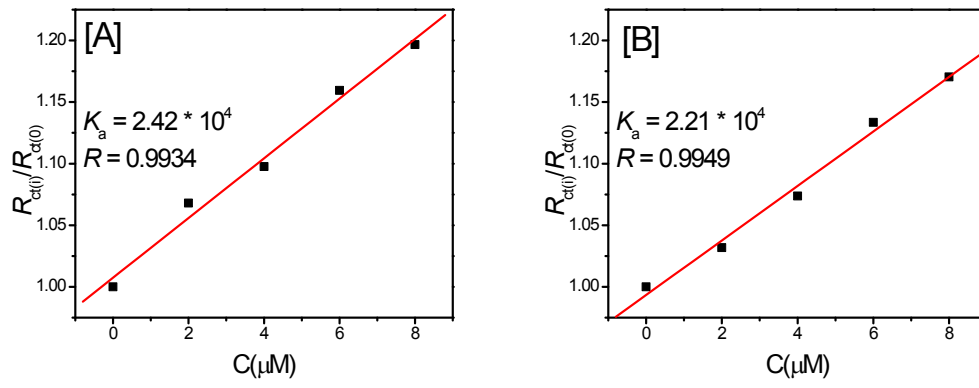

**Figure 5.** The Langmuir isotherm plots for HSA-NCH[A] and BSA-NCH[B] system.

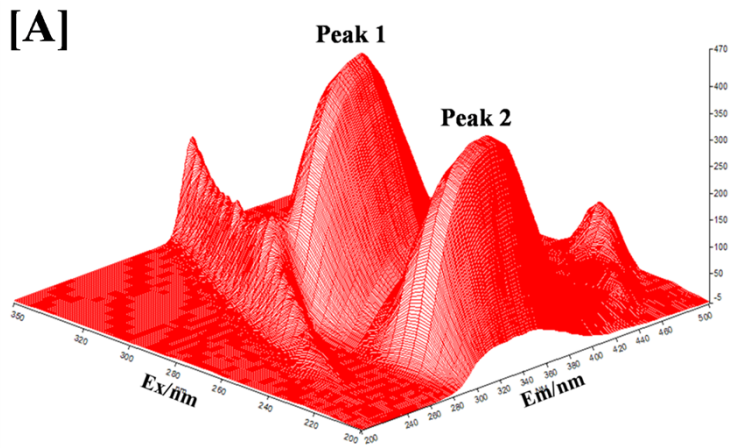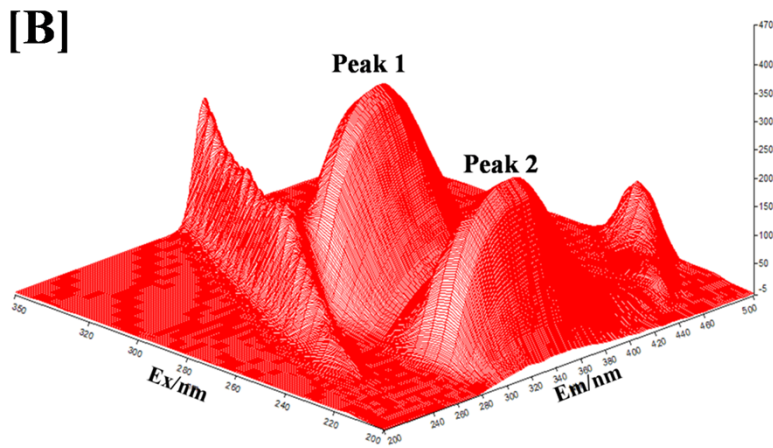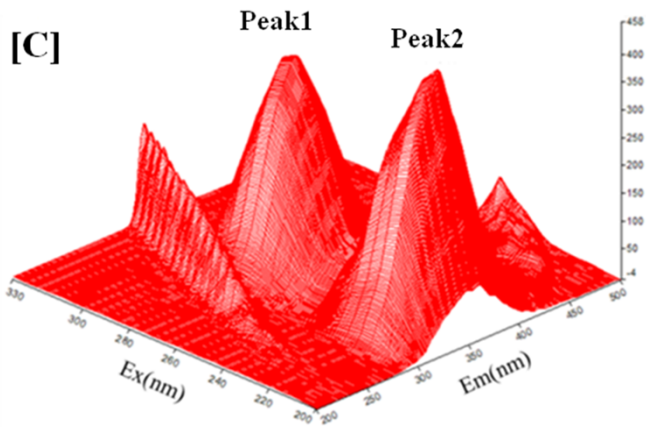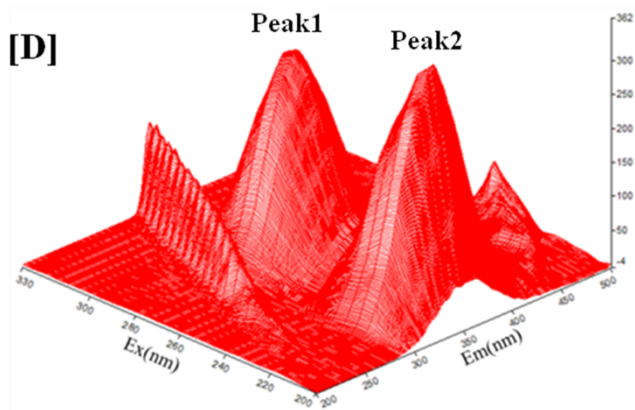

**Figure 6.** 3D fluorescence spectra of HSA[A], NCH-HSA[B], BSA[C] and BSA-NCH[D].

$c(\text{HSA}) = c(\text{BSA}) = c(\text{NCH}) = 2 \mu\text{M}$ ;  $\lambda_{\text{ex}} = 200 - 350 \text{ nm}$ ,  $\lambda_{\text{em}} = 200 - 500 \text{ nm}$ .

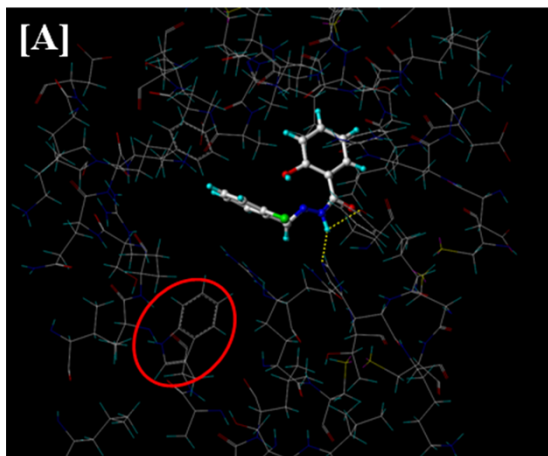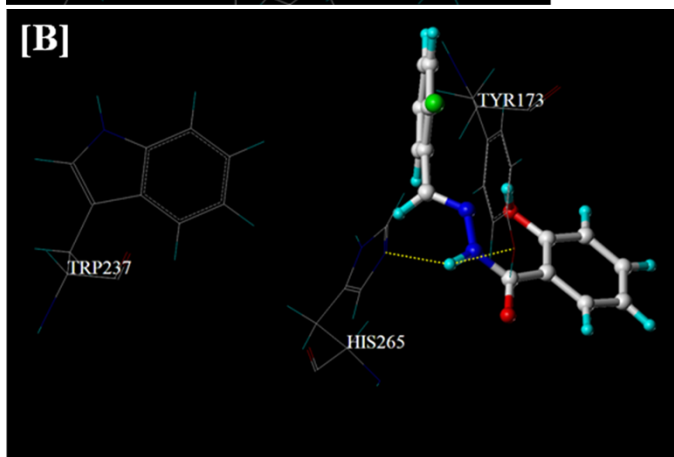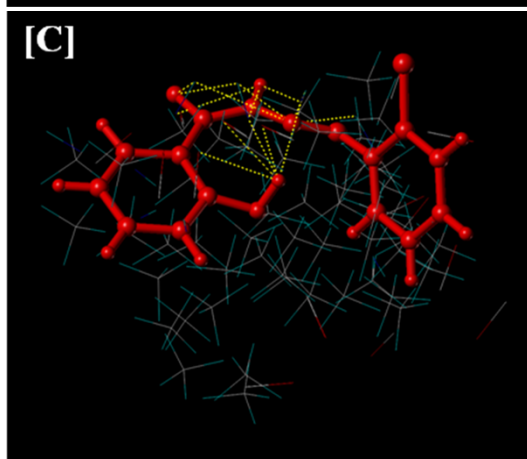



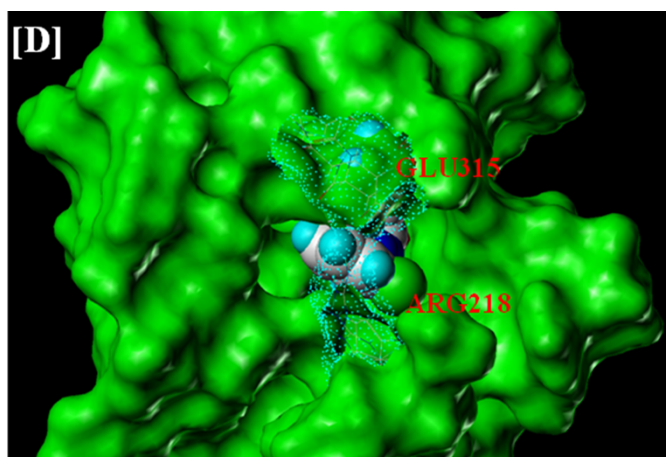

**Figure 7.** The detailed docking results of NCH and BSA.

[A]: The configuration of NCH in binding site of BSA. NCH is shown in ball-stick model, while Trp237 we concerned are showed in the red circle. All hydrogen bonds are showed as yellow dashed lines. [B]: The illustration of hydrogen bonds and the conformation of Trp237 and NCH. NCH is shown in ball-stick model. [C]:The align of NCH with the protomol. There are three kinds of probe: CH<sub>4</sub> for the hydrophobicity, C=O for hydrophilicity and hydrogen bond acceptor and N-H for hydrophilicity and hydrogen bond donor and acceptor. [D]:The illustration of the obstacle (blue dot ARG218 and GLU315 surface ) in the entrance pathway of NCH into the binding site.
